# Supplementary material
Source: Research Square preprint supplement (doi:10.21203/rs.3.rs-8793606/v1)
Supplement: Supplementary file 1 [file 7d26f85471c438fec563d877.docx]

**Supplementary Material**

**Table S1**

*Prevalence of Three Excluded RTSHIA Items Assessed at Age 13* (n = 666)

| Type of Behaviour | Frequency Reported by Adolescents | | | |  |  |  |
| --- | --- | --- | --- | --- | --- | --- | --- |
|  | Never | Once | More than Once | Many Times | | Total Prevalence | Repeated Prevalence |
| Pulling Hair % | 68 | 17 | 11 | 3 | | 32 | 15 |
| Hurtful Relationship % | 74 | 15 | 8 | 2 | | 26 | 11 |
| Hurtful thoughts % | 83 | 9 | 6 | 3 | | 17 | 9 |

*Note.* Total prevalence describes the prevalence of having engaged in the described self-harming behaviour at least once. Repeated prevalence describes the percentage of adolescents reporting repeated self-harm (more than once & many times) for at least one of the described behaviour
